# Supplementary material for: Top-down modulation of dichotic listening affects interhemispheric connectivity: an electroencephalography study
Source: Frontiers journal article supplement (doi:10.3389/fnins.2024.1424746), 2024-09-12
Supplement: Data_Sheet_1.pdf [file Data_Sheet_1.pdf]

## Supplementary Material 1

### A) Behavioural Data (Dichotic Listening Task)

One-way repeated-measures ANOVA for the three conditions (LA: left-attention, NA: No-attention and RA: right-attention)

#### Within Subjects Effects

| Cases      | Sphericity Correction | Sum of Squares        | df                 | Mean Square           | F                   | p                                   | $\eta^2_p$ |
|------------|-----------------------|-----------------------|--------------------|-----------------------|---------------------|-------------------------------------|------------|
| Conditions | None                  | 7635.483 <sup>a</sup> | 2.000 <sup>a</sup> | 3817.741 <sup>a</sup> | 15.803 <sup>a</sup> | $3.068 \times 10^{-6}$ <sup>a</sup> | 0.345      |
|            | Greenhouse-Geisser    | 7635.483              | <b>1.580</b>       | 4833.970              | <b>15.803</b>       | $2.375 \times 10^{-5}$              | 0.345      |
| Residuals  | None                  | 14495.106             | 60.000             | 241.585               |                     |                                     |            |
|            | Greenhouse-Geisser    | 14495.106             | 47.386             | 305.892               |                     |                                     |            |

Note. Type III Sum of Squares

<sup>a</sup> Mauchly's test of sphericity indicates that the assumption of sphericity is violated ( $p < .05$ ).

### Assumption Checks

#### Test of Sphericity

|            | Mauchly's W | Approx. X <sup>2</sup> | df | p-value      | Greenhouse-Geisser $\epsilon$ | Huynh-Feldt $\epsilon$ | Lower Bound $\epsilon$ |
|------------|-------------|------------------------|----|--------------|-------------------------------|------------------------|------------------------|
| Conditions | 0.734       | 8.975                  | 2  | <b>0.011</b> | 0.790                         | 0.826                  | 0.500                  |

### Post Hoc Tests

#### Post Hoc Comparisons - Conditions

|       | Mean Difference | SE    | t      | Cohen's d | p <sub>Holm</sub>          |
|-------|-----------------|-------|--------|-----------|----------------------------|
| LA NA | -12.847         | 3.948 | -3.254 | -0.517    | <b>0.004</b> **            |
| RA    | -22.097         | 3.948 | -5.597 | -0.890    | $1.715 \times 10^{-6}$ *** |
| NA RA | -9.250          | 3.948 | -2.343 | -0.373    | <b>0.022</b> *             |

\*  $p < .05$ , \*\*  $p < .01$ , \*\*\*  $p < .001$

Note. P-value adjusted for comparing a family of 3

## B) EEG Analysis(Lagged-phase synchronisation)

### 1) Brodmann areas (BAs) 41

Two-way repeated-measures ANOVA to compare the groups of two factors: conditions (LA: left-attention, NA: No-attention and RA: right-attention) and reports (LE: left ear and RE: Right ear) at the interval 200 ms – 300 ms after stimulus presentation.

#### Within Subjects Effects

| Cases                | Sum of Squares         | df | Mean Square            | F     | p            | $\eta^2_p$ |
|----------------------|------------------------|----|------------------------|-------|--------------|------------|
| Conditions           | 0.002                  | 2  | 0.001                  | 1.098 | 0.340        | 0.036      |
| Residuals            | 0.058                  | 58 | 0.001                  |       |              |            |
| Reports              | 0.005                  | 1  | 0.005                  | 6.732 | <b>0.015</b> | 0.188      |
| Residuals            | 0.023                  | 29 | $8.033 \times 10^{-4}$ |       |              |            |
| Conditions * Reports | $6.053 \times 10^{-4}$ | 2  | $3.027 \times 10^{-4}$ | 0.567 | 0.570        | 0.019      |
| Residuals            | 0.031                  | 58 | $5.341 \times 10^{-4}$ |       |              |            |

*Note.* Type III Sum of Squares

## 2) Brodmann areas (BAs) 42

Two-way repeated-measures ANOVA to compare the groups of two factors: conditions (LA: left-attention, NA: No-attention and RA: right-attention) and reports (LE: left ear and RE: Right ear) at the interval 200 ms – 300 ms after stimulus presentation.

### Within Subjects Effects

| Cases                | Sum of Squares         | df | Mean Square            | F     | p            | $\eta^2_p$ |
|----------------------|------------------------|----|------------------------|-------|--------------|------------|
| Conditions           | 0.005                  | 2  | 0.002                  | 3.211 | <b>0.048</b> | 0.100      |
| Residuals            | 0.044                  | 58 | $7.602 \times 10^{-4}$ |       |              |            |
| Reports              | 0.003                  | 1  | 0.003                  | 5.204 | <b>0.030</b> | 0.152      |
| Residuals            | 0.018                  | 29 | $6.341 \times 10^{-4}$ |       |              |            |
| Conditions * Reports | $5.698 \times 10^{-5}$ | 2  | $2.849 \times 10^{-5}$ | 0.046 | 0.955        | 0.002      |
| Residuals            | 0.036                  | 58 | $6.247 \times 10^{-4}$ |       |              |            |

*Note.* Type III Sum of Squares

### Post Hoc Comparisons - Conditions

|       | Mean Difference | SE    | t      | Cohen's d | $p_{\text{holm}}$ |
|-------|-----------------|-------|--------|-----------|-------------------|
| LA NA | 0.007           | 0.005 | 1.355  | 0.217     | 0.361             |
| RA    | -0.006          | 0.005 | -1.177 | -0.189    | 0.361             |
| NA RA | -0.013          | 0.005 | -2.532 | -0.406    | <b>0.042*</b>     |

\*  $p < .05$

*Note.* P-value adjusted for comparing a family of 3

*Note.* Results are averaged over the levels of: Reports

**Two paired-sample Student's t-tests** were applied (NA LE VS RA LE, and NA RE VS NA RE) to explore which side of ear reports resulted in the significant difference in LPS between RA and NA.

| Measure 1 | Measure 2 | t      | df | p     | Cohen's d |
|-----------|-----------|--------|----|-------|-----------|
| NA LE     | - RA LE   | -2.032 | 29 | 0.051 | -0.371    |
| NA RE     | - RA RE   | -2.153 | 29 | 0.040 | -0.393    |
